# Supplementary material for: Maturation of Induced Pluripotent Stem Cell Derived Hepatocytes by 3D-Culture
Source: PubMed Central journal article supplement (PMC3899231; doi:10.1371/journal.pone.0086372), 2014-01-22

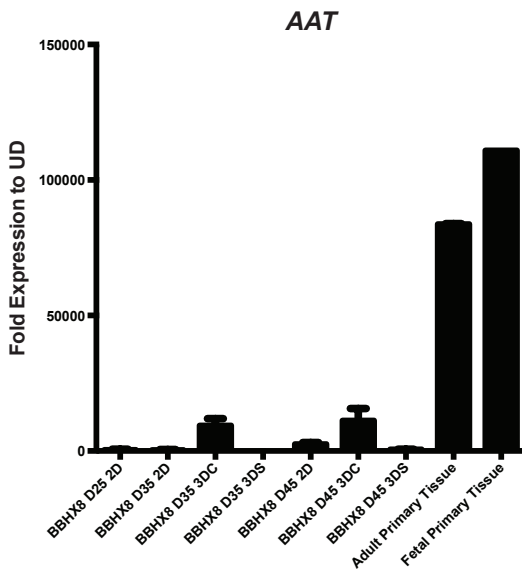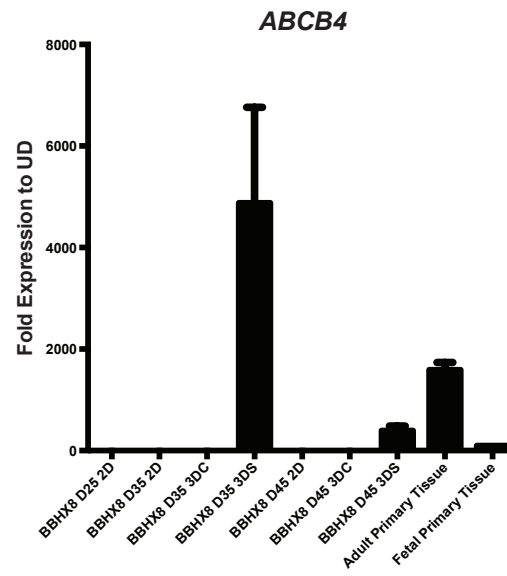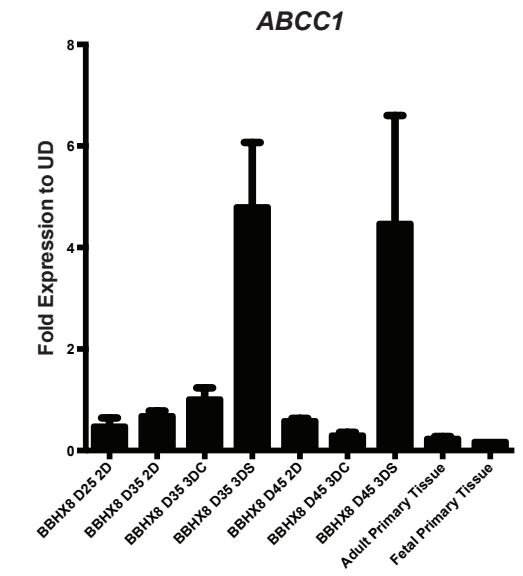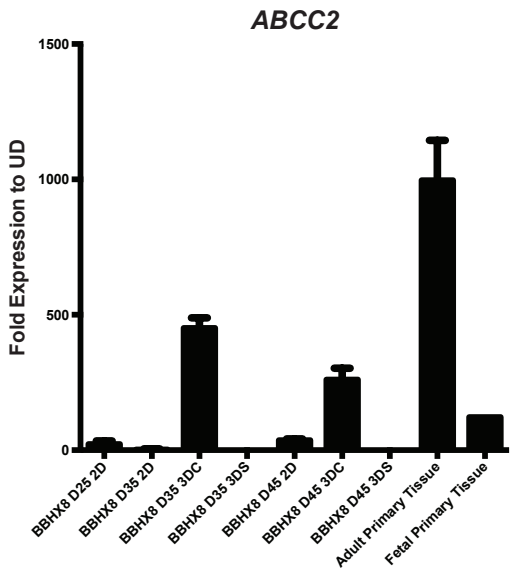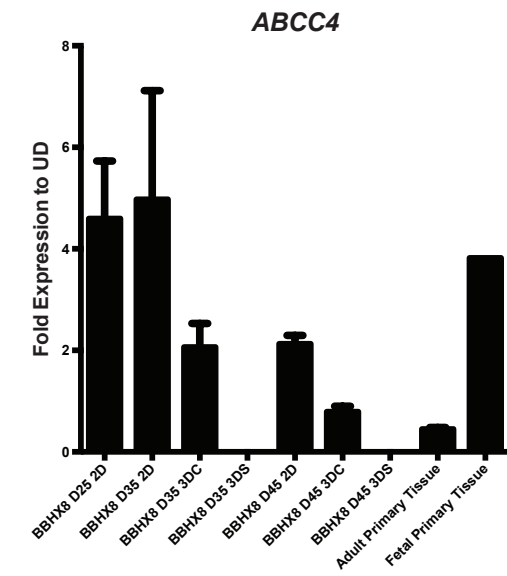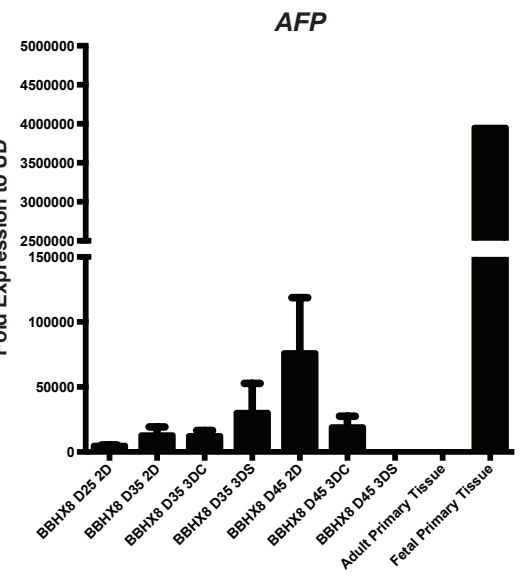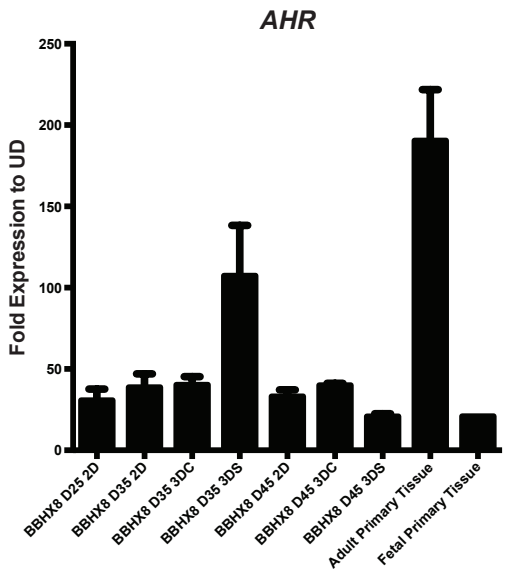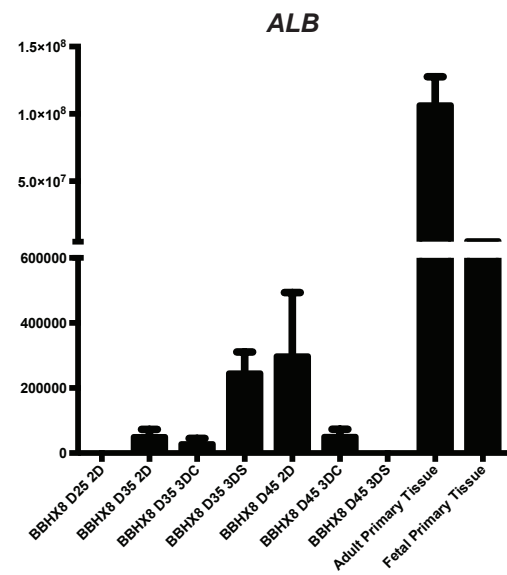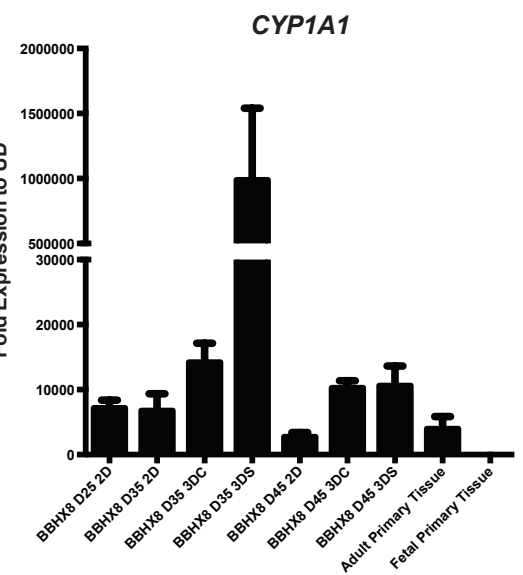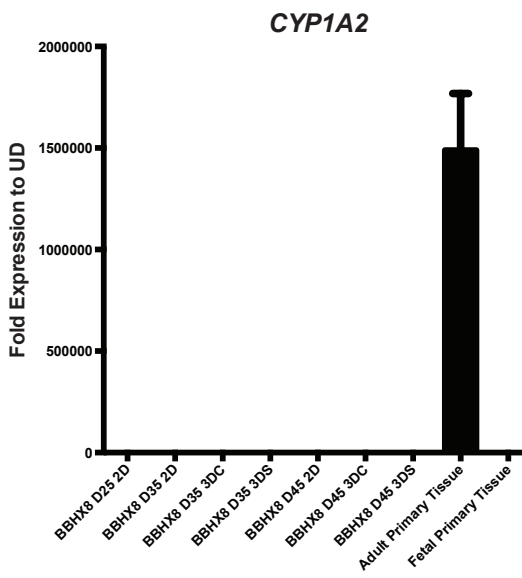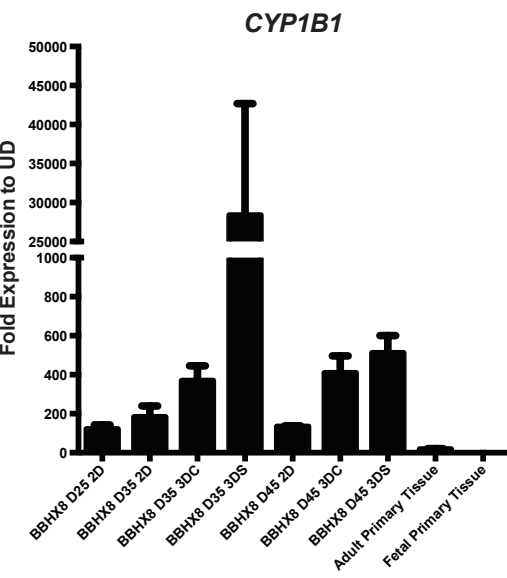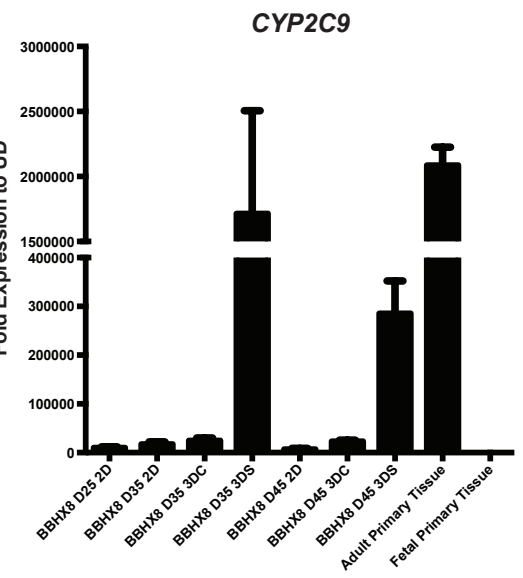

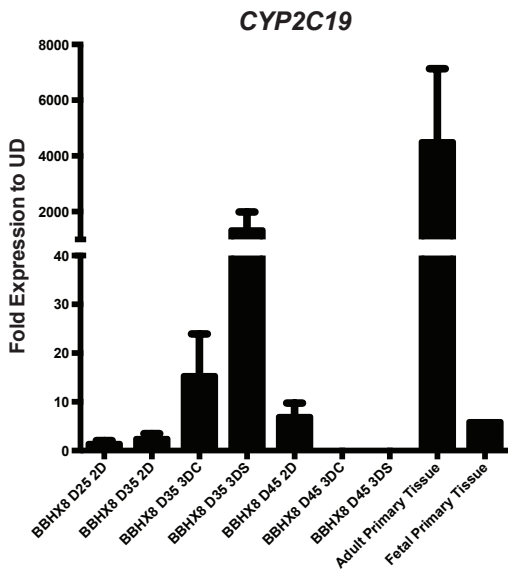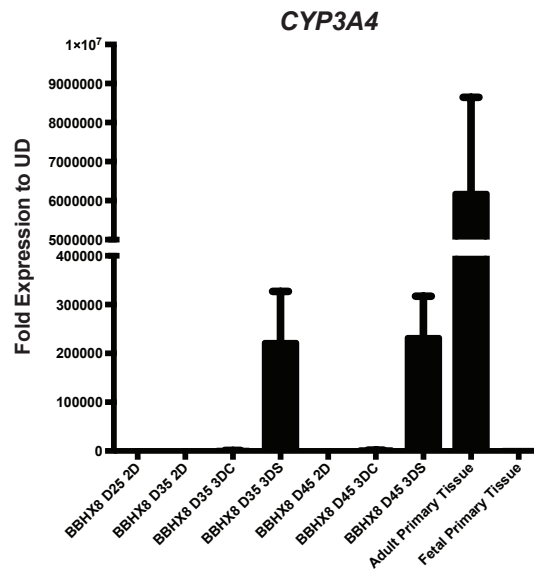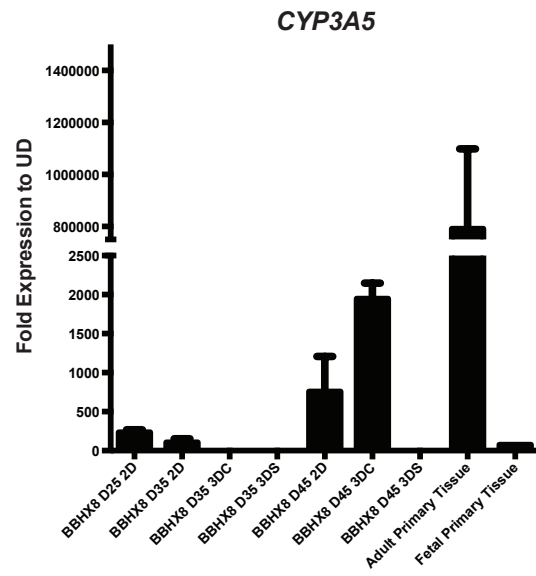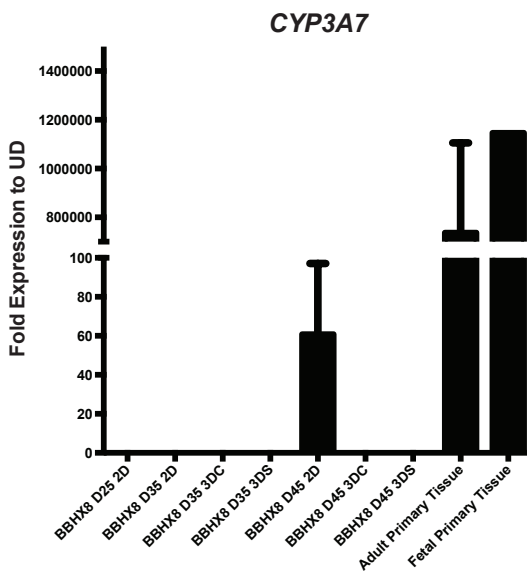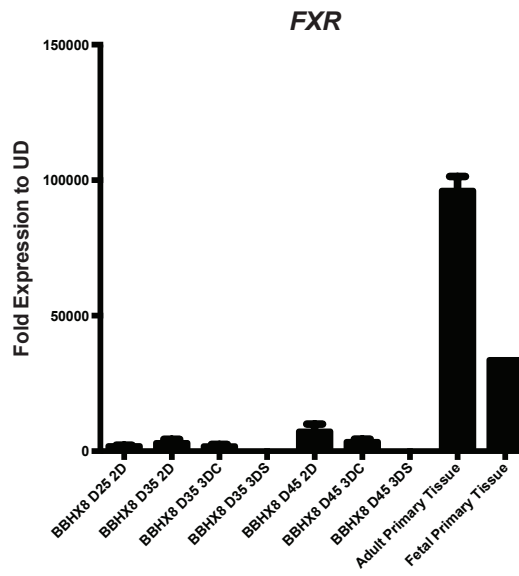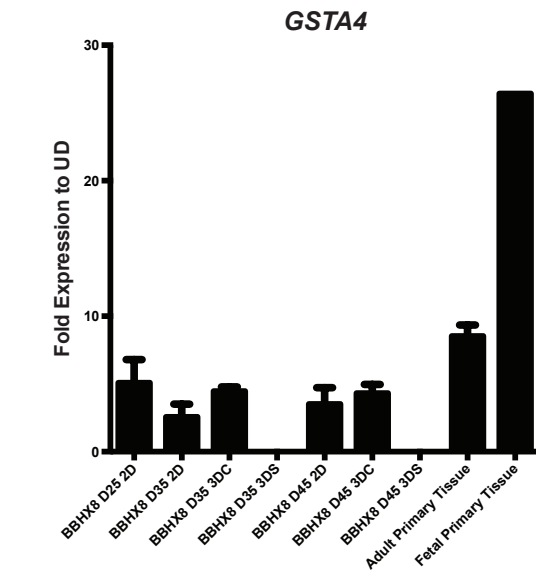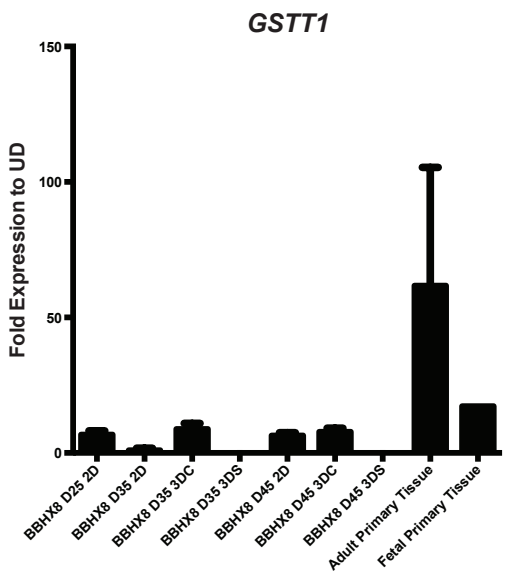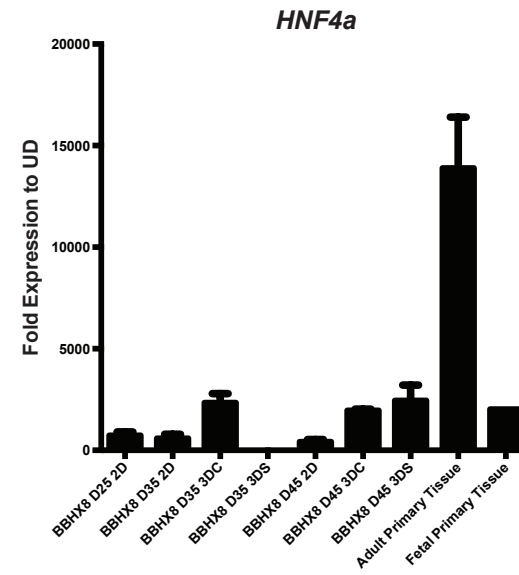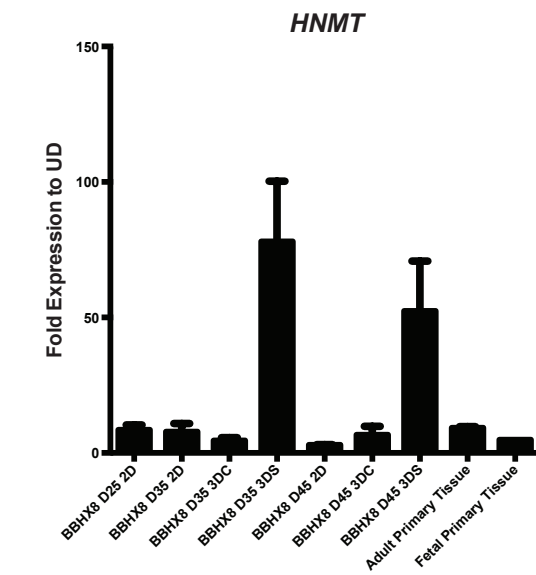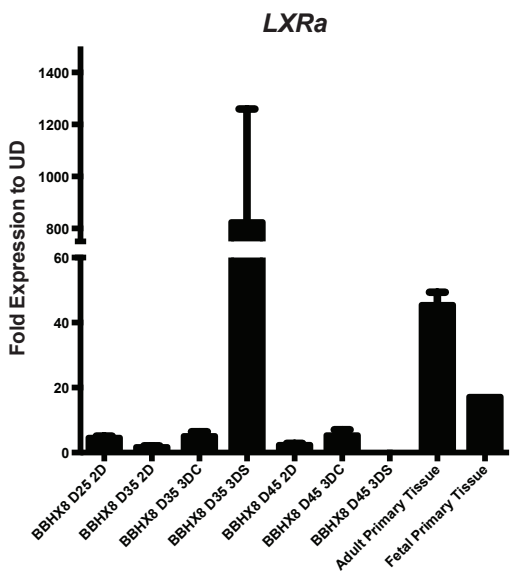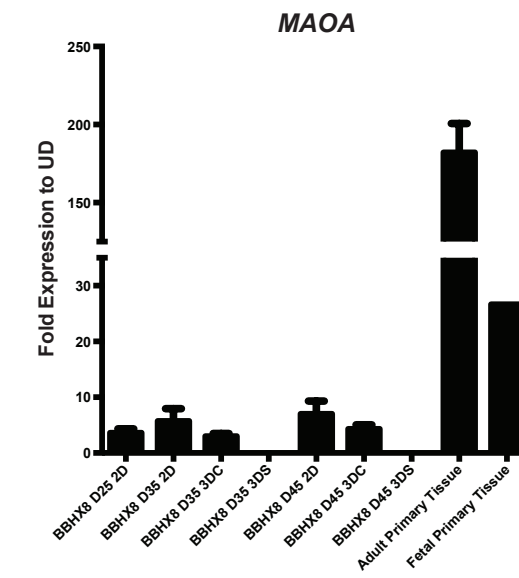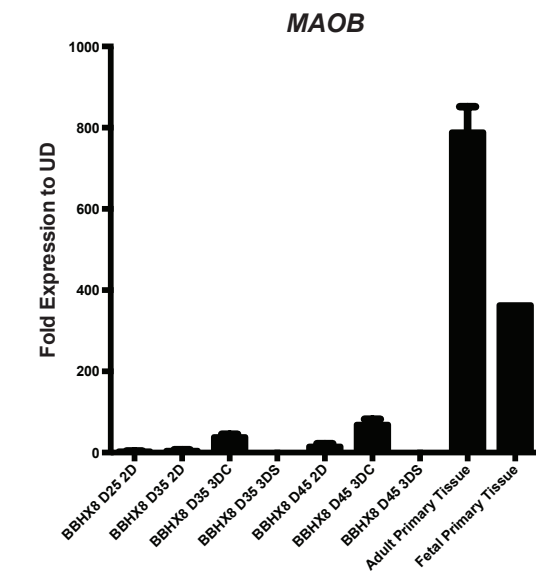

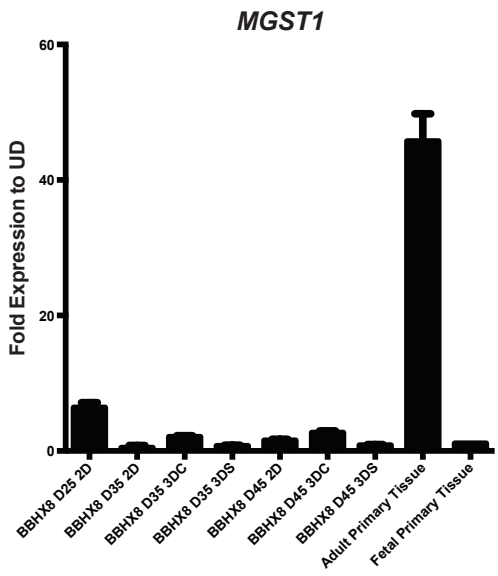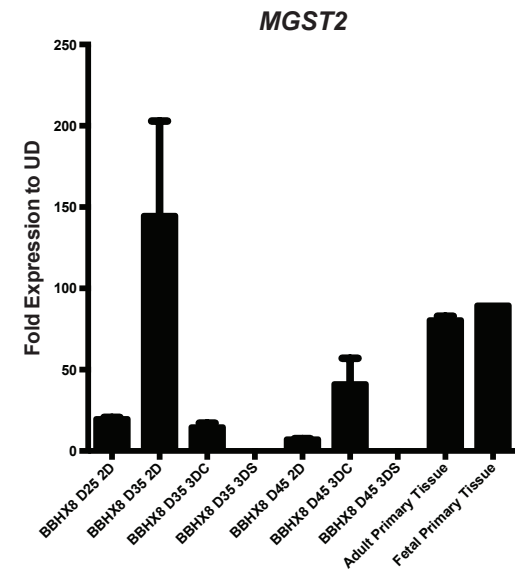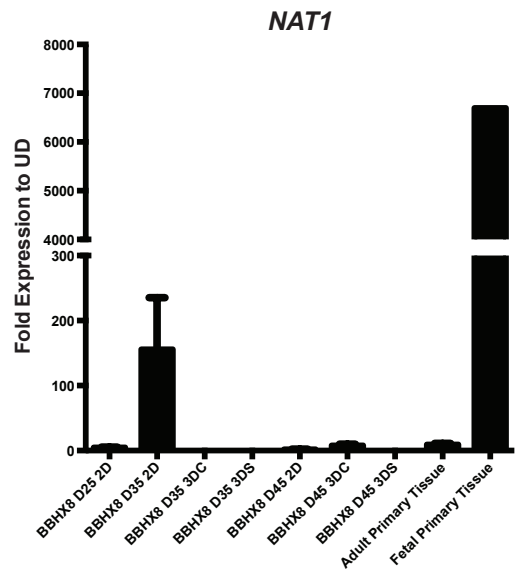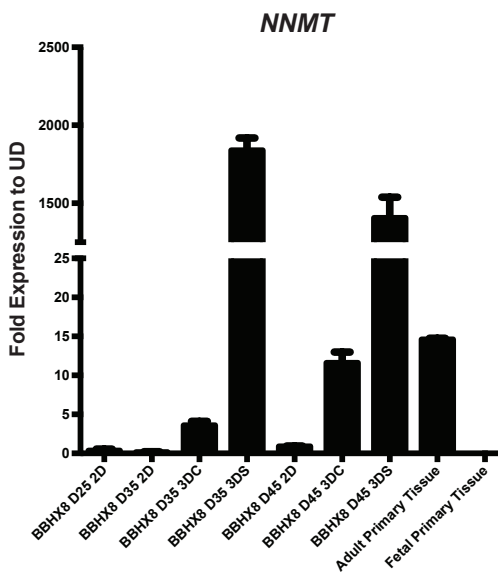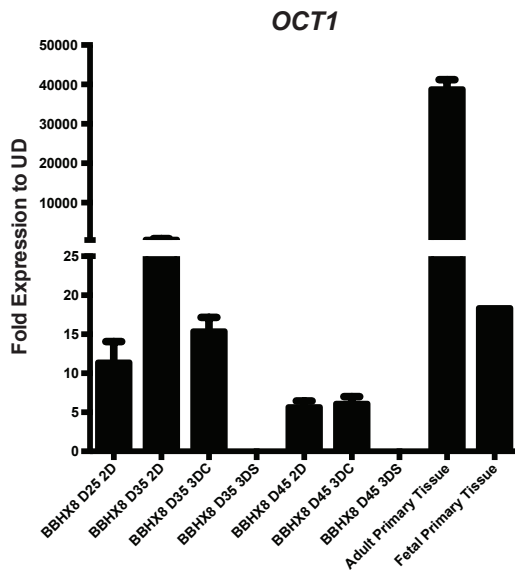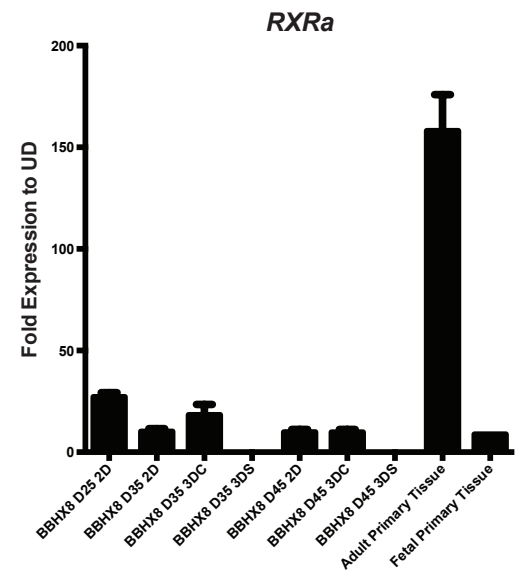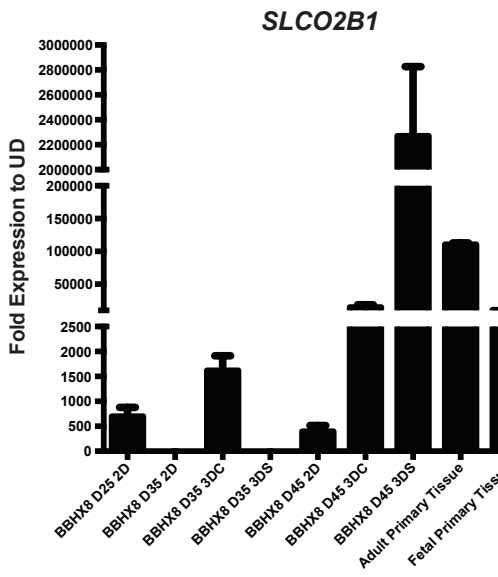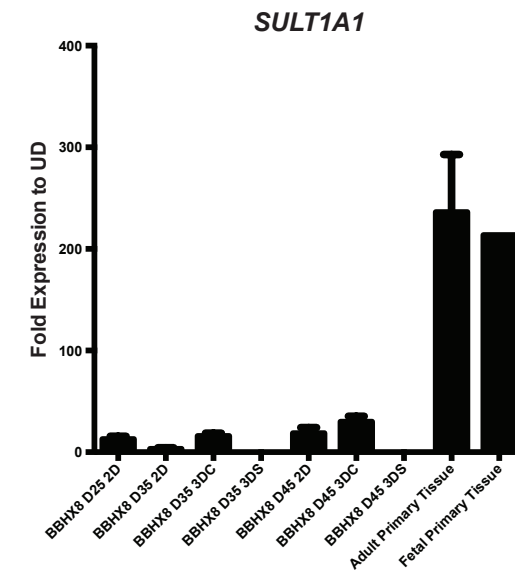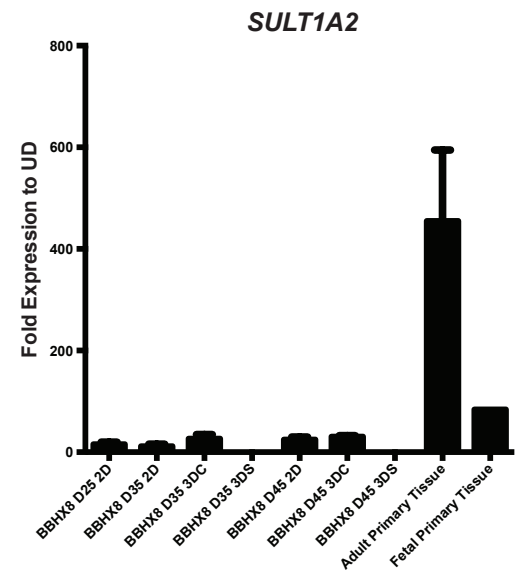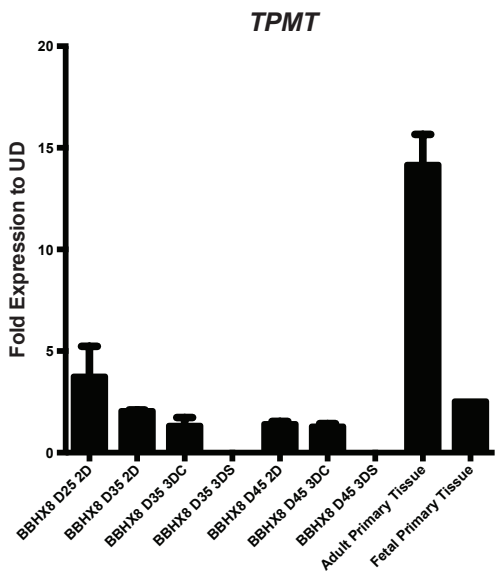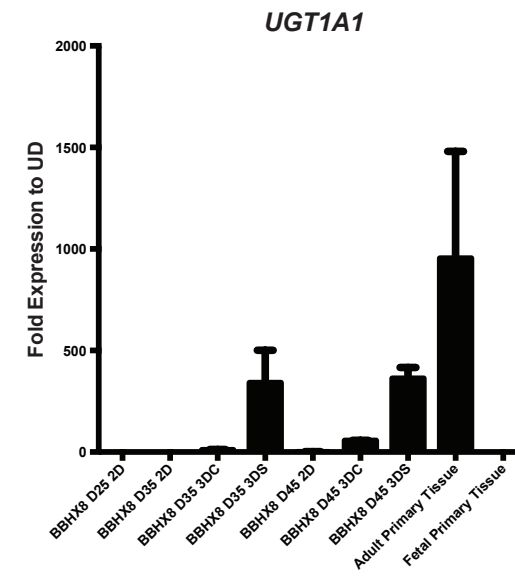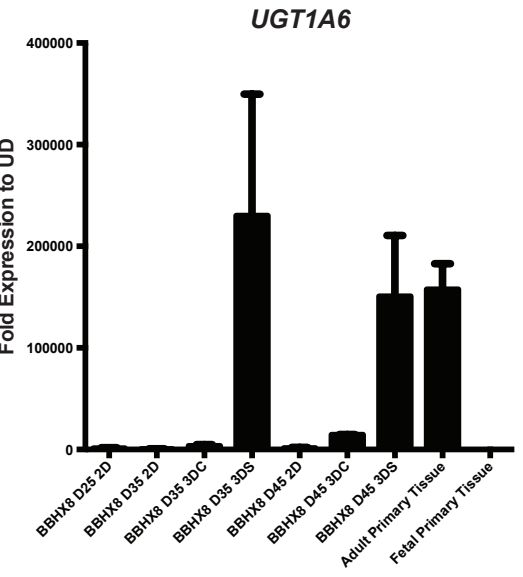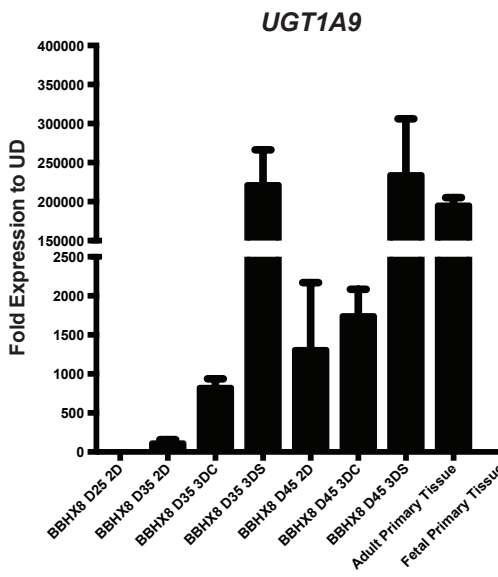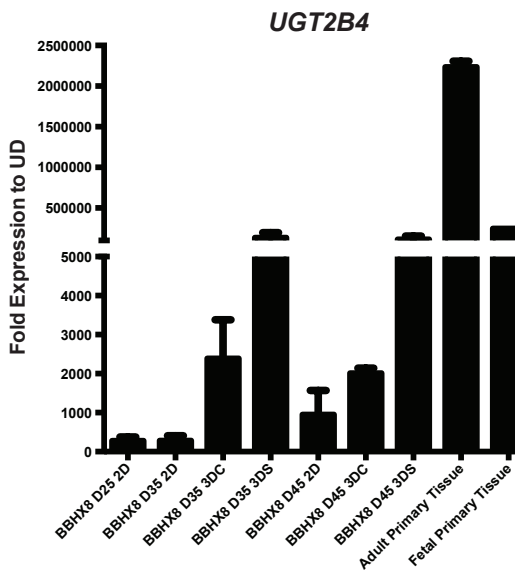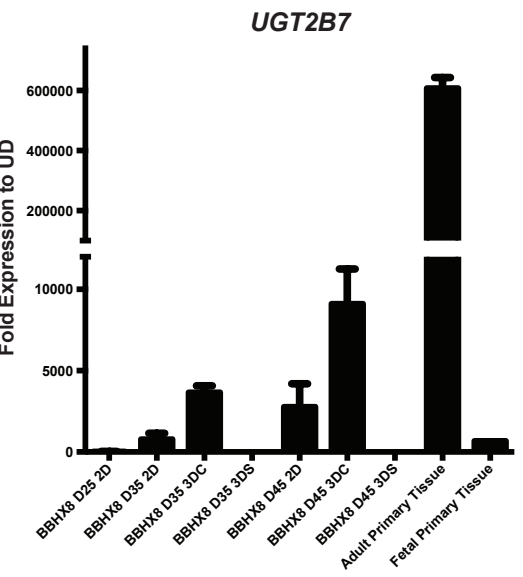

Supplement: pone.0086372.s004.pdf [file pone.0086372.s004.pdf]
