# Supplementary material for: Maturation of Induced Pluripotent Stem Cell Derived Hepatocytes by 3D-Culture
Source: PubMed Central journal article supplement (PMC3899231; doi:10.1371/journal.pone.0086372), 2014-01-22
Supplement: pone.0086372.s011.pdf [file pone.0086372.s011.pdf]

| Gene    | Full Name                                                                                                              | Accession      | Forward                |
|---------|------------------------------------------------------------------------------------------------------------------------|----------------|------------------------|
| ABCB4   | Homo sapiens ATP-binding cassette, sub-family B (MDR/TAP), member 4 (ABCB4), transcript variant A, mRNA                | NM_000443.3    | CGGGACAGTCTTCTCGAT     |
| ABCC1   | Homo sapiens ATP-binding cassette, sub-family C (CFTR/MRP), member 1 (ABCC1), mRNA                                     | NM_004996.3    | ATCGCTACCCCTGTCTCG     |
| ABCC2   | Homo sapiens ATP-binding cassette, sub-family C (CFTR/MRP), member 2 (ABCC2), mRNA                                     | NM_000392.3    | AGAGTCTTCGTTCCAGACGA   |
| ABCC4   | Homo sapiens ATP-binding cassette, sub-family C (CFTR/MRP), member 4 (ABCC4), transcript variant 1, mRNA               | NM_005845.3    | TTGTCCCGTCAGCTTTTT     |
| AHR     | Homo sapiens aryl hydrocarbon receptor (AHR), mRNA                                                                     | NM_001621.4    | TGTCCGAGTCCCATTCGG     |
| CYP2C9  | Homo sapiens cytochrome P450, family 2, subfamily C, polypeptide 9 (CYP2C9), mRNA                                      | NM_000771.3    | GCCGAGATGGGAAATGTTGCT  |
| FXR     | Homo sapiens nuclear receptor subfamily 1, group H, member 4 (NR1H4), transcript variant 1, mRNA                       | NM_001206979.1 | GCAAAGATGGGAAATGTTGCT  |
| GSTA4   | Homo sapiens glutathione S-transferase alpha 4 (GSTA4), mRNA                                                           | NM_001512.3    | GATGGGTTTAGCTGCCGCC    |
| GSTT1   | Homo sapiens glutathione S-transferase theta 1 (GSTT1), mRNA                                                           | NM_000853.2    | GTCCGCTGCCCTCCCACTATG  |
| HNMT1   | Homo sapiens N-methyltransferase 1 (HNMT1), mRNA                                                                       | NM_021079.3    | ACAATATCCGCGAGGACGCC   |
| LXRα    | Homo sapiens nuclear receptor subfamily 1, group H, member 3 (NR1H3), transcript variant 1, mRNA                       | NM_005693.3    | GTCCCTCCCTCAGCTTTC     |
| MAOA    | Homo sapiens monoamine oxidase A (MAOA), nuclear gene encoding mitochondrial protein, transcript variant 1, mRNA       | NM_000240.3    | CGGAGGTGGCATTTCAGGACT  |
| MAOB    | Homo sapiens monoamine oxidase B (MAOB), nuclear gene encoding mitochondrial protein, mRNA                             | NM_000898.4    | ACAATATCCGCGAGTGGCTGTG |
| MGST1   | Homo sapiens microsomal glutathione S-transferase 1 (MGST1), transcript variant 5, mRNA                                | NM_001260511.1 | TCGGCTCACCACAAAATTGA   |
| MGST2   | Homo sapiens microsomal glutathione S-transferase 2 (MGST2), transcript variant 1, mRNA                                | NM_002413.4    | ATTGTGGATGGCTGGGTGGT   |
| NAT1    | Homo sapiens N-acetyltransferase 1 (arylamine N-acetyltransferase) (NAT1), transcript variant 1, mRNA                  | NM_001160170.1 | GGCCCAACAGGCTTCTTACC   |
| NNMT    | Homo sapiens nicotinamide N-methyltransferase (NNMT), mRNA                                                             | NM_006169.2    | GTCTCAATCCCTGGCGCT     |
| OCT1    | Homo sapiens solute carrier family 22 (organic cation transporter), member 1 (SLC22A1), transcript variant 1, mRNA     | NM_003057.2    | GGTGTTCCTCCCTGTGGA     |
| RXRα    | Homo sapiens retinoid X receptor, alpha (RXRA), mRNA                                                                   | NM_002957.4    | GTCCGACATGGACACCAA     |
| SLCO2B1 | Homo sapiens solute carrier organic anion transporter family, member 2B1 (SLCO2B1), transcript variant 2, mRNA         | NM_001145211.2 | TCAGGGAGAGCCAGAGTGA    |
| SULT1A1 | Homo sapiens sulfotransferase family, cytosolic, 1A, phenol-preferring, member 1 (SULT1A1), transcript variant 1, mRNA | NM_001055.3    | CTCAGAGAAACACCTGCAT    |
| SULT1A2 | Homo sapiens sulfotransferase family, cytosolic, 1A, phenol-preferring, member 2 (SULT1A2), transcript variant 1, mRNA | NM_001054.3    | TTCCACACAAACCCACCA     |
| TPMT    | Homo sapiens thiopurine S-methyltransferase (TPMT), mRNA                                                               | NM_000367.2    | AACGAGTGAAGGGAGCA      |
| UGT1A1  | Homo sapiens UDP glucuronosyltransferase 1 family, polypeptide A1 (UGT1A1), mRNA                                       | NM_000463.2    | TGATCCAGTGGATGGGACG    |
| UGT1A6  | Homo sapiens UDP glucuronosyltransferase 1 family, polypeptide A6 (UGT1A6), transcript variant 1, mRNA                 | NM_001072.3    | GGAGCCCTGGATTGGAGAGT   |
| UGT1A9  | Homo sapiens UDP glucuronosyltransferase 1 family, polypeptide A9 (UGT1A9), mRNA                                       | NM_021027.2    | AGGAACATTTATTGACCCGTTT |
| UGT2B4  | Homo sapiens UDP glucuronosyltransferase 2 family, polypeptide B4 (UGT2B4), mRNA                                       | NM_021139.2    | AAAGGAGCAGCACTGGAAAACA |
| UGT2B7  | Homo sapiens UDP glucuronosyltransferase 2 family, polypeptide B7 (UGT2B7), mRNA                                       | NM_001074.2    | TCCACAACTCACCCTCTC     |
| AAT     | Homo sapiens serpin peptidase inhibitor, clade A (alpha-1 antitrypsin), member 1, mRNA                                 | NM_000295.4    | CCATTGTGAAGACTTAGTGATG |
| AFP     | Homo sapiens alpha-fetoprotein (AFP), mRNA                                                                             | NM_001134.2    | AGAACTGTACAACTGTGTG    |
| ALB     | Homo sapiens albumin (ALB), mRNA                                                                                       | NM_000477.5    | CCTTGGCAATGAAGTGGTAACC |
| CYP1A1  | Homo sapiens cytochrome P450, family 1, subfamily A, polypeptide 1 (CYP1A1), mRNA                                      | NM_000499.3    | AAACAGGGCCACATAGATGC   |
| CYP1A2  | Homo sapiens cytochrome P450, family 1, subfamily A, polypeptide 2 (CYP1A2), mRNA                                      | NM_000761.3    | AGGCAACCATGACCCAGAG    |
| CYP1B1  | Homo sapiens cytochrome P450, family 1, subfamily B, polypeptide 1 (CYP1B1), mRNA                                      | NM_000104.3    | CACCAAGCTGAGACAGTGA    |
| CYP2C19 | Homo sapiens cytochrome P450, family 2, subfamily C, polypeptide 19 (CYP2C19), mRNA                                    | NM_000769.1    | AACTCCTCTGCCCACT       |
| CYP3A4  | Homo sapiens cytochrome P450, family 3, subfamily A, polypeptide 4 (CYP3A4), transcript variant 1, mRNA                | NM_017460.5    | TGTGCTGAGAACCCAGAG     |
| CYP3A5  | Homo sapiens cytochrome P450, family 3, subfamily A, polypeptide 5 (CYP3A5), mRNA                                      | NM_000777.2    | CCCTTTGTGAGACCACTA     |
| CYP3A7  | Homo sapiens cytochrome P450, family 3, subfamily A, polypeptide 7 (CYP3A7), mRNA                                      | NM_000765      | ATTCCAAGTATGTTCTCATCAT |
| HNF4    | Homo sapiens hepatocyte nuclear factor 4, alpha (HNF4A), transcript variant 1, mRNA                                    | NM_178849.2    | CATGGCCAAGTGGAAACCT    |
| PBDG    | Homo sapiens hydroxymethylbilane synthase (HMBS), transcript variant 1, mRNA                                           | NM_000190.3    | GGAGCCATGCTGGTAACGG    |
| RPLP0   | Homo sapiens ribosomal protein, large, P0 (RPLP0), transcript variant 1, mRNA                                          | NM_001002.3    | GGCTCCTCTGTGAAGTGAC    |
| HDAC    | Homo sapiens histone deacetylase 2 (HDAC2), transcript variant 1, mRNA                                                 | NM_001527.3    | AGTCAAGGAGGGCGGAAAA    |
| GAPDH   | Homo sapiens glyceraldehyde-3-phosphate dehydrogenase (GAPDH), transcript variant 1, mRNA                              | NM_002046.4    | GAGTCAACGGATTTGGTCTG   |
