# Supplementary material for: Maturation of Induced Pluripotent Stem Cell Derived Hepatocytes by 3D-Culture
Source: PLoS One. 2014 Jan 22;9(1):e86372. doi: 10.1371/journal.pone.0086372 (PMC3899231; doi:10.1371/journal.pone.0086372)
Supplement: Table S6 — Significance of BOB5 SC qPCR analyses by Welch’s T-test. (PDF) [file pone.0086372.s016.pdf]

| Key   |                                              |
|-------|----------------------------------------------|
| G.N.E | Gene not expressed in one or both conditions |
| n.s.  | $P > 0.05$                                   |
| *     | $P \leq 0.05$                                |
| **    | $P < 0.01$                                   |
| ***   | $P < 0.001$                                  |
| ****  | $P < 0.0001$                                 |
