# Supplementary material for: Maturation of Induced Pluripotent Stem Cell Derived Hepatocytes by 3D-Culture
Source: PLoS One. 2014 Jan 22;9(1):e86372. doi: 10.1371/journal.pone.0086372 (PMC3899231; doi:10.1371/journal.pone.0086372)
Supplement: Table S7 — Significance of BOB7 RM qPCR analyses by Welch’s T-test. (PDF) [file pone.0086372.s017.pdf]

[illegible]

| Key   |                                   |
|-------|-----------------------------------|
| G.N.E | Gene not expressed in one or both |
| n.s.  | P > 0.05                          |
| *     | P ≤ 0.05                          |
| **    | P < 0.01                          |
| ***   | P < 0.001                         |
| ****  | P < 0.0001                        |
